# Supplementary material
Source: PubMed Central journal article supplement (PMC5019495)

Extended Data Fig. 2b

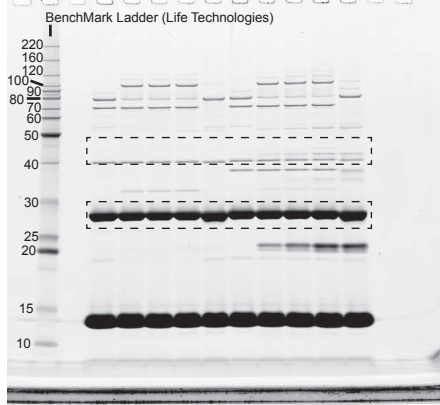

Fig. 1a bottom

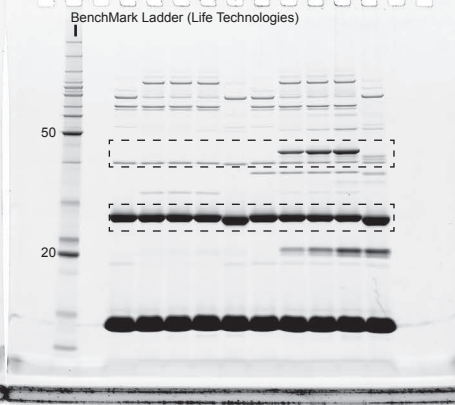

Fig. 1a top

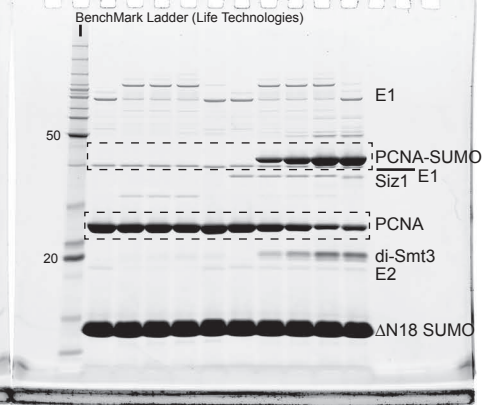

Extended Data Fig. 1a left, top

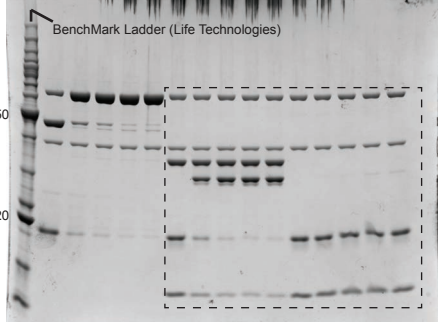

Extended Data Fig. 1a left, bottom

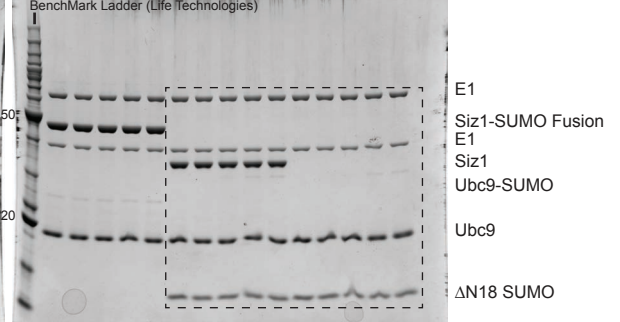

Extended Data Fig. 1a middle, top

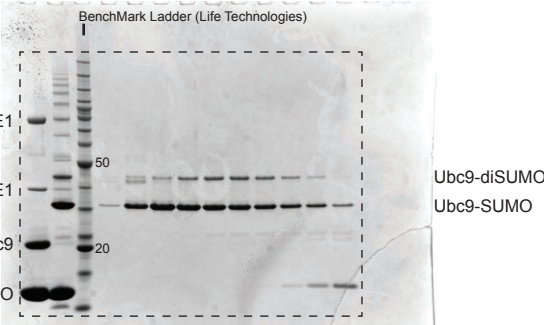

Extended Data Fig. 1a middle, bottom

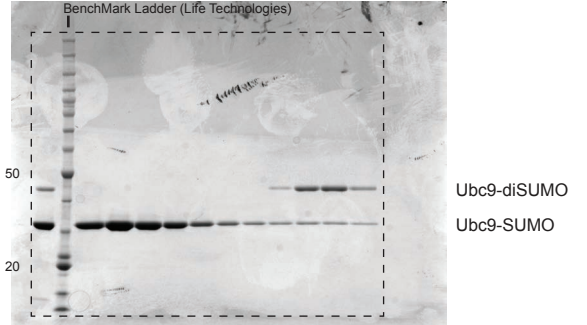

Extended Data Fig. 1a right

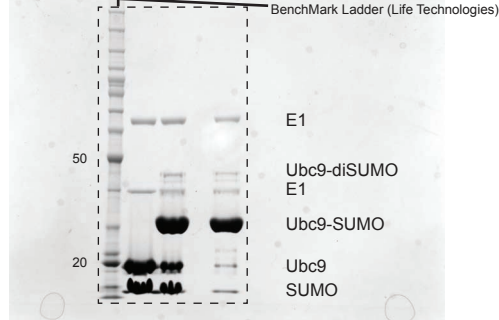

Extended Data Fig. 1b

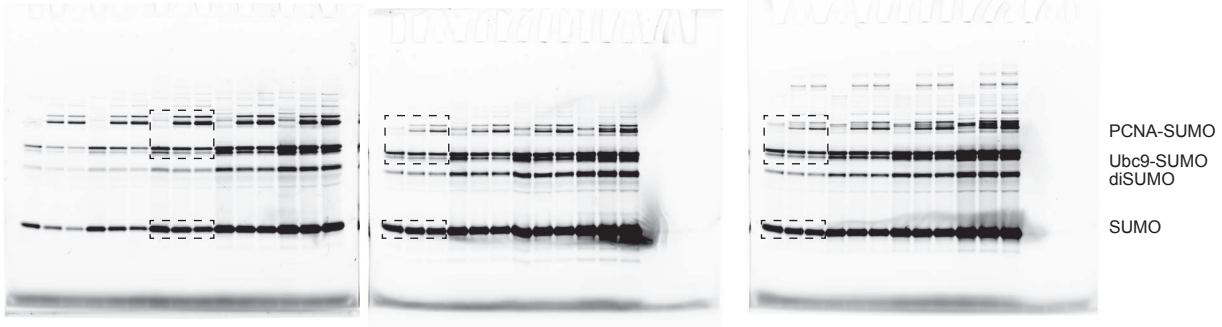

Extended Data Fig. 1c

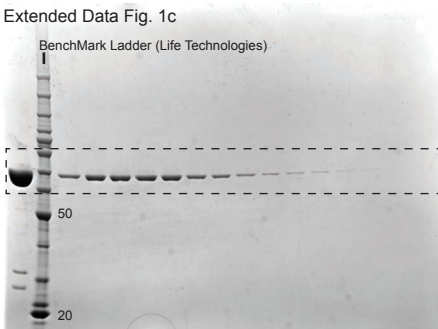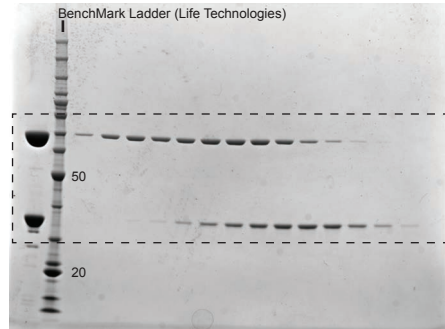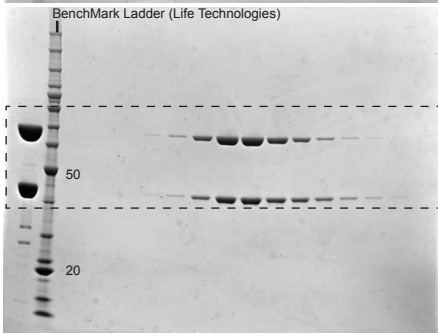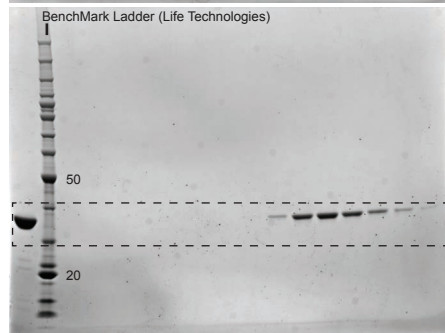

Extended Data Fig. 2c

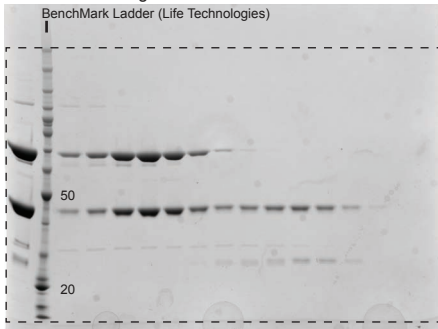

Extended Data Fig. 3f, Extended Data Fig. 5b,c, Extended Data Fig. 3f

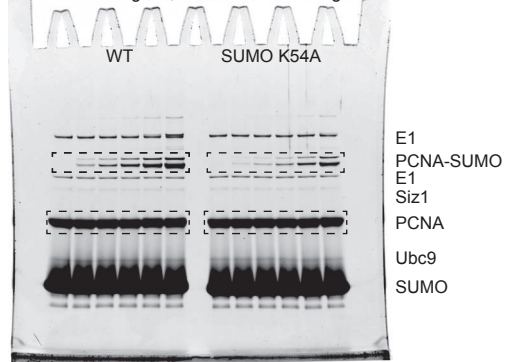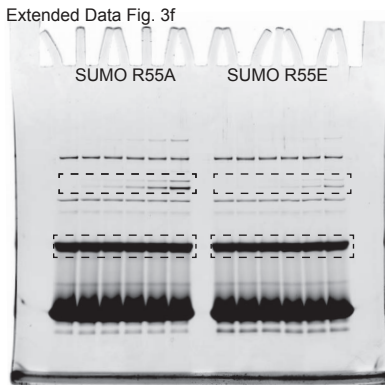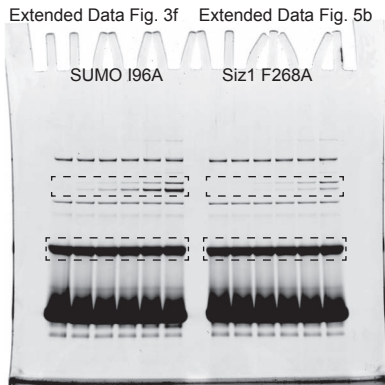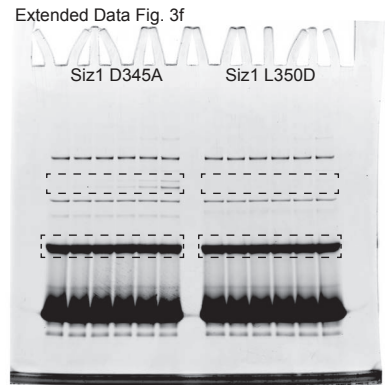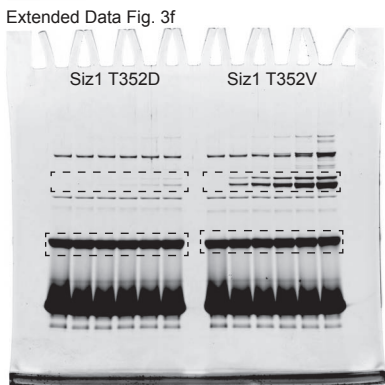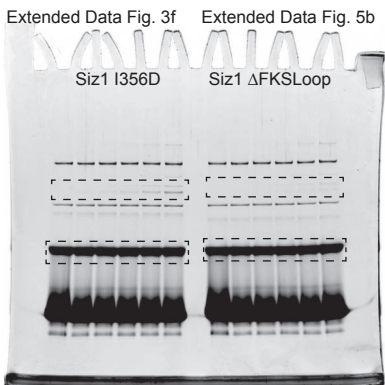

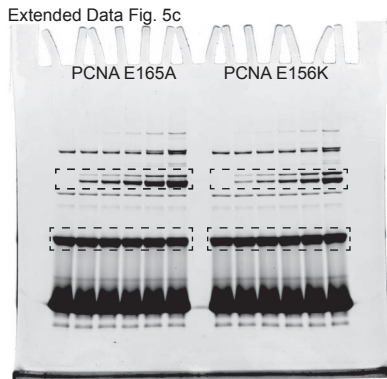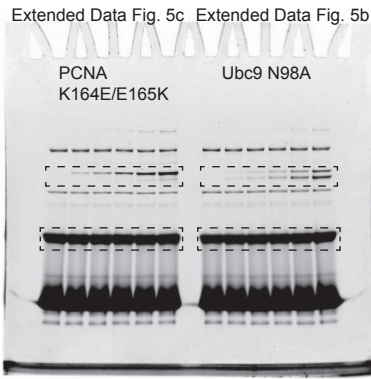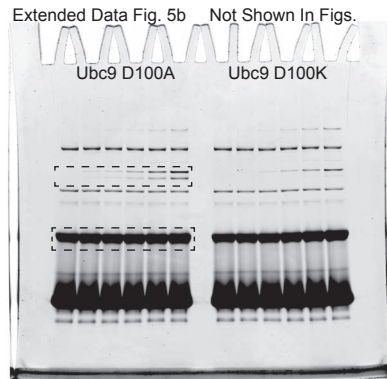

E1  
PCNA-SUMO  
E1  
Siz1  
PCNA  
Ubc9  
SUMO

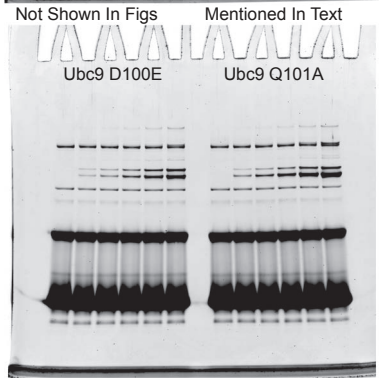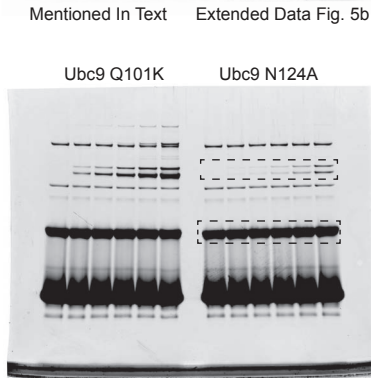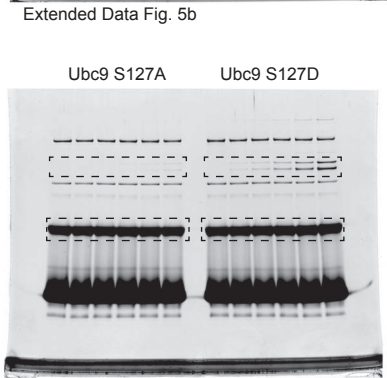

E1  
PCNA-SUMO  
E1  
Siz1  
PCNA  
Ubc9  
SUMO

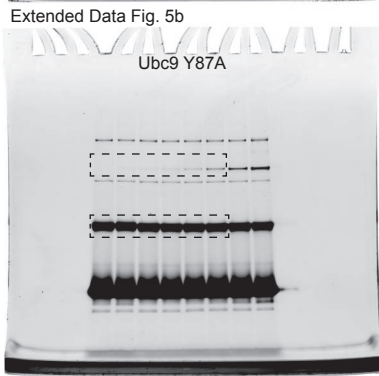

E1  
PCNA-SUMO  
E1  
Siz1  
PCNA  
Ubc9  
SUMO

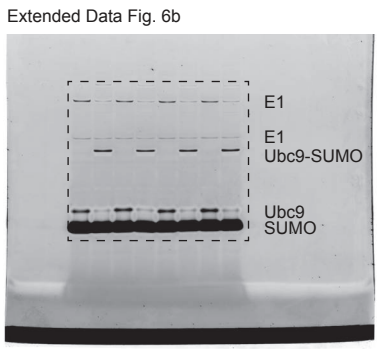

E1  
E1-Ubc9-SUMO  
Ubc9-SUMO

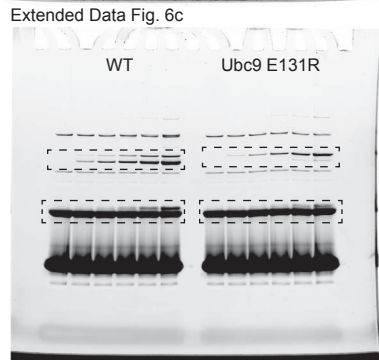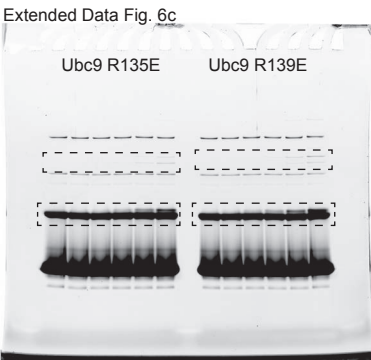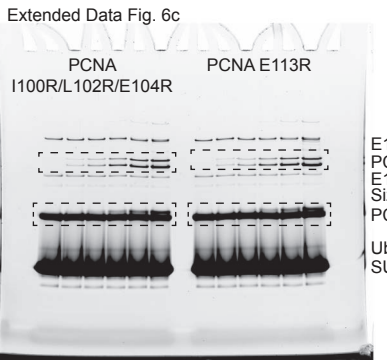

E1  
PCNA-SUMO  
E1  
Siz1  
PCNA  
Ubc9  
SUMO

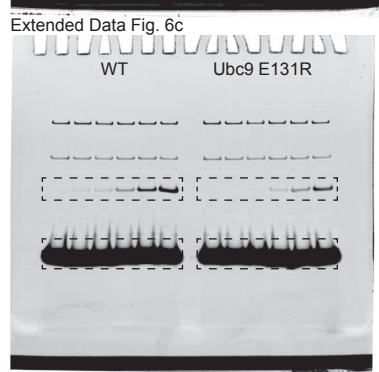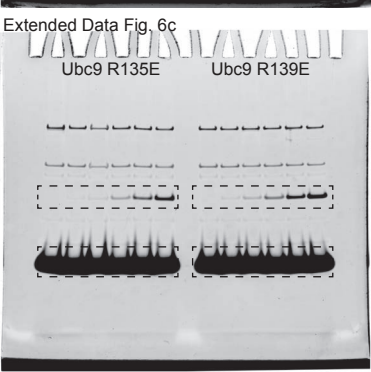

E1  
E1  
Siz1  
diSUMO  
Ubc9  
SUMO



Extended Data Fig. 4b

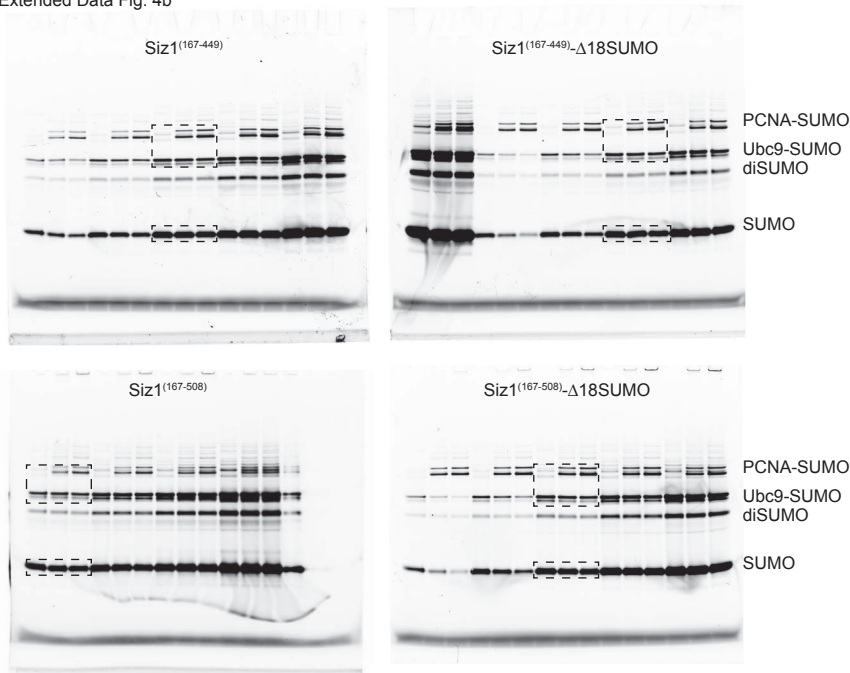

Extended Data Fig. 5d

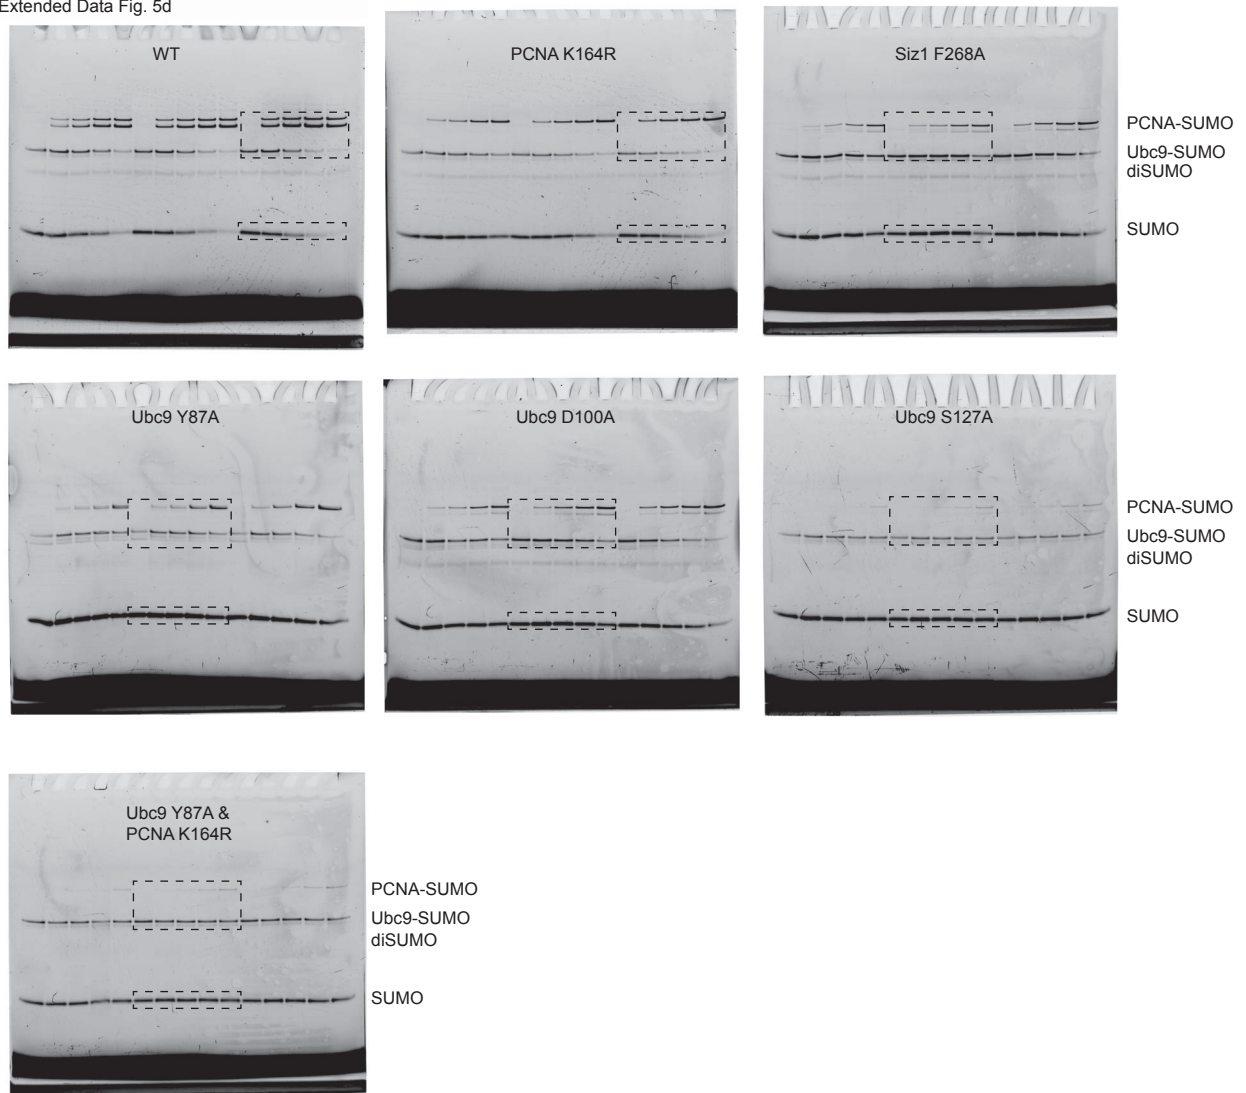

Supplement: NIHMS800477-supplement-supp_fig1.pdf [file NIHMS800477-supplement-supp_fig1.pdf]
